# Supplementary material for: Added insult to injury? The response of meat-associated pathogens to proposed antimicrobial interventions
Source: PubMed Central journal article supplement (PMC10774175; doi:10.1007/s00253-023-12849-x), 2024-01-08
Supplement: 253_2023_12849_MOESM1_ESM.pdf [file 253_2023_12849_MOESM1_ESM.pdf]

## **Supplementary Tables**

**Journal :** Applied Microbiology and Biotechnology

**Title:** Added Insult to Injury? The Response of Meat-Associated Pathogens to Proposed Antimicrobial Interventions

**Authors:** <sup>1,4</sup> Marmion, Maitiú; <sup>1,4</sup> Macori, Guerrino; <sup>5</sup> Barroug, Soukaina; <sup>2,6</sup> Soro, Arturo B.; <sup>5</sup> Bourke, Paula; <sup>6</sup> Tiwari, B. K.; <sup>2</sup> Whyte, Paul; <sup>1,3,4</sup> Scannell, Amalia G. M

**Affiliations:** <sup>1</sup>UCD School of Agriculture and Food Science, <sup>2</sup>UCD School of Veterinary Medicine, <sup>3</sup>UCD Institute of Food and Health, <sup>4</sup>UCD Centre for Food Safety, <sup>5</sup>UCD School of Biosystems and Engineering, School of Public Health, Physiotherapy & Sports Science; University College Dublin, Belfield, Dublin 4, Ireland, D04V4W8. <sup>6</sup>Department of Food Chemistry and Technology, Teagasc Food Research Centre, Ashtown, Dublin 15, D15 KN3K, Ireland.

**Corresponding author:** Maitiú Marmion; [matthew.marmion@ucdconnect.ie](mailto:matthew.marmion@ucdconnect.ie)

**Supplementary Table 1. Genes upregulated in Control and Treated *Salmonella enterica* ser. Typhimurium.**

| Treatment              | Control Samples                                                                                                                                                                                                                                                                                                                             | Treated Samples                                                                                                                                                                                                                                                                                                                                                                                                                                                                                                                                                                                                                                                                                                                                                                                                                                                                                                                                                                                                                                                                                                                                                                                                                                                                                                                                                                                                                                                                                                                                                                                                                                                                                                                                                                                                                                                                                                                                                                                                                                                                                                                                                                                                                                                                                                                                                                                                                                                                                                                                                                                                                                                                                                                                                        |
|------------------------|---------------------------------------------------------------------------------------------------------------------------------------------------------------------------------------------------------------------------------------------------------------------------------------------------------------------------------------------|------------------------------------------------------------------------------------------------------------------------------------------------------------------------------------------------------------------------------------------------------------------------------------------------------------------------------------------------------------------------------------------------------------------------------------------------------------------------------------------------------------------------------------------------------------------------------------------------------------------------------------------------------------------------------------------------------------------------------------------------------------------------------------------------------------------------------------------------------------------------------------------------------------------------------------------------------------------------------------------------------------------------------------------------------------------------------------------------------------------------------------------------------------------------------------------------------------------------------------------------------------------------------------------------------------------------------------------------------------------------------------------------------------------------------------------------------------------------------------------------------------------------------------------------------------------------------------------------------------------------------------------------------------------------------------------------------------------------------------------------------------------------------------------------------------------------------------------------------------------------------------------------------------------------------------------------------------------------------------------------------------------------------------------------------------------------------------------------------------------------------------------------------------------------------------------------------------------------------------------------------------------------------------------------------------------------------------------------------------------------------------------------------------------------------------------------------------------------------------------------------------------------------------------------------------------------------------------------------------------------------------------------------------------------------------------------------------------------------------------------------------------------|
| Antimicrobial Marinade | <b>30 Genes/Loci:</b> <i>araB, ccmA, ccmB, fdhE, fdxH, groL, fdxH, groL, NUW86_00545, NUW86_00875, NUW86_02255, NUW86_02265, NUW86_05725, NUW86_05735, NUW86_08340, NUW86_15095, NUW86_19225, NUW86_19240, NUW86_21055, NUW86_22615, NUW86_22625, NUW86_22830, NUW86_22845, NUW86_23550, NUW86_24050, ppnN, rho, rseP, tcuA, tcuB, wecA</i> | <b>1675 Genes/Loci:</b> <i>accA, accD, aceA, aceE, aceF, acnA, acnB, acrB, acrD, acs, adeP, adhE, adk, alaC, alaS, allR, amiB, amtB, amyA, apbC, araA, arcA, arcA, arcB, argB, argE, argG, argP, argR, argS, arnA, arnC, arnD, arnE, arnF, arnT, aroC, aroG, artJ, artM, artQ, artP, asnA, asnB, aspS, atpA, atpB, atpD, atpG, atpH, bamA, barA, bcsE, bcsF, bcsG, bglX, bioA, bioB, bioC, bioD, bioF, birA, murB, brxL, btsT, btuB, murI, btuF, mtnN, cadA, caiF, carA, carB, casA, casB, cdsH, cgtA, chbG, cheW, cheZ, chiP, citD, citE, citS, clpB, clpX, cls, cmoM, mukB, mukE, mukF, coaBC, dut, copA, corA, corC, cpxA, cpxR, cra, creB, creC, crr, csgD, cstA, cyaA, cybC, cycA, cydA, cydB, cydC, cydD, cysA, cysP, cysT, cysW, cysD, cysG, cysI, cysJ, cysM, cysS, dacA, dacC, dacD, damX, dapA, dapD, dcd, dctA, dcuA, ddlA, deaD, yrbN, der, dgcJ, dgcQ, dgt, dinB, dksA, dld, dnaJ, dnaK, dnaX, dpiA, dpiB, dppB, dppC, dppD, dppF, dprA, smg, dsdX, dtpB, dusB, dxs, eamA, edd, emrB, eno, entD, entS, envC, envZ, ompR, epd, epmB, eptA, pmrA, ettA, eutA, eutH, eutK, eutP, eutQ, eutT, pta, fabB, fabF, fabG, fabI, fabY, fadA, fadB, fadI, fadJ, fbp, fdnG, fdnG, fepB, fepC, fepD, fepG, fetA, fetB, fhuE, fimH, fis, fldB, flgK, fliB, fliF, fliG, fliH, fliI, fnr, folK, pcnB, folP, glmM, foxA, frdA, frdB, fruA, fruB, fruK, fsa, ftsE, ftsX, ftsI, mraY, murE, murF, ftsL, rsmH, ftsW, murD, murG, ftsY, ftsZ, fucP, fumA, fusa, gabP, gabT, galK, galM, galP, gapA, gcl, gcvP, ggt, ghxP, glgA, glgC, glgP, glk, glmS, glmU, glnD, glnE, glnP, glnQ, glnS, glpK, glpX, glrR, qseG, gltB, gltD, gltJ, gltK, gltL, gltP, glyQ, glyS, gntR, gntT, gph, rpe, trpS, gpmA, grcA, greA, gsiA, gspE, hofC, gss, guaB, gudD, gyrA, gyrB, hcp, helD, hema, hemB, hflC, hflK, hflX, hild, hisA, hisB, hisC, hisD, hisF, hisH, hisIE, hisP, hmsP, hns, holA, lptE, hpaA, hpaE, hpaG, hpaX, hrpA, hscA, hsdR, hslU, hypB, hypC, hypD, hypE, iaaA, iadA, iagB, ibpA, ibpB, icd, ileS, lspA, ilvA, ilvC, ilvG, ilvM, infB, infC, invC, spaK, spaM, spaN, spaO, spaP, iolE, iolG1, iolH, iolI2, iprA, iscR, iscS, kdga, kdpB, kdpC, kdpD, kdpE, kdsB, ycaR, kefB, kefG, kefC, keff, kup, lapB, ldtB, lepB, leuA, leuB, leuS, lexA, lgt, lhgO, ligA, lipA, livF, livG, livH, livM, livJ, lolC, lolD, lolE, lon, lpdA, lpfE, lplA, lpoB, thiK, lptB, lptD, lptF, lptG, lpxA, lpxB, rnhB, lpxC, lpxD, lpxM, lpxO, lrp, lysA, lysP, lysS, macA, macB, maeB, maiA, malK, malM, malP, malZ, mazG, mdsA, mdsB, mdtA, mdtB, mdtK, mdtQ, melB, metB, meth, metK, metL, metQ, mfd, mgtA, miaA, mutL, mlrA, mnmE, mnmG, mpl, mrcA, mrcB, mrdB, mreB, mreC, mscM, mscS, mutM, nadD, nagB, nagK, nagZ, nanA, nanT, napA, napD, napF, narK, nfi, nfsB, nhaR, nifJ, nirB,</i> |

*nirD, nlpI, norV, norW, npr, rapZ, nrdB, yfaE, nrdD, nrfA, nudC, nudE, nudK, nuoC, nuoE, nuoF, nuoJ, nuoK, nuoL, nuoM, nuoN, nupC, nusA, NUW86\_00030, NUW86\_00050, NUW86\_00055, dgoD, dgoR, NUW86\_00115, NUW86\_00130, NUW86\_00140, ccmD, ccmE, dsbE, NUW86\_00165, NUW86\_00290, NUW86\_00295, NUW86\_00420, NUW86\_00475, NUW86\_00690, NUW86\_00740, NUW86\_00835, NUW86\_00845, NUW86\_00855, araD, ulaD, NUW86\_00935, NUW86\_01005, NUW86\_01010, tag, NUW86\_01065, NUW86\_01070, NUW86\_01080, NUW86\_01180, NUW86\_01190, NUW86\_01195, NUW86\_01445, NUW86\_01450, NUW86\_01470, ugpQ, NUW86\_01655, NUW86\_01695, NUW86\_01900, NUW86\_01905, NUW86\_01945, NUW86\_02225, NUW86\_02290, NUW86\_02340, panF, NUW86\_02390, rng, NUW86\_02480, NUW86\_02490, NUW86\_02530, NUW86\_02585, NUW86\_02790, NUW86\_02870, NUW86\_02930, NUW86\_02935, NUW86\_02975, NUW86\_03115, NUW86\_03135, NUW86\_03150, NUW86\_03320, nudF, NUW86\_03345, NUW86\_03360, NUW86\_03395, NUW86\_03480, NUW86\_03510, hybA, hybB, hybC, hybE, hypA, NUW86\_03530, NUW86\_03535, NUW86\_03600, NUW86\_03825, NUW86\_03905, NUW86\_04095, NUW86\_04340, rlmM, NUW86\_04440, gudP, NUW86\_04535, NUW86\_04625, ispD, ispF, surE, truD, NUW86\_04670, NUW86\_04675, NUW86\_04680, NUW86\_04690, NUW86\_04695, NUW86\_04705, NUW86\_04710, NUW86\_04925, orgA, orgB, prgJ, prgK, NUW86\_05015, NUW86\_05035, hycF, hycG, hycl, NUW86\_05255, NUW86\_05390, NUW86\_05430, NUW86\_05435, NUW86\_05440, NUW86\_05450, NUW86\_05455, NUW86\_05530, NUW86\_05535, NUW86\_05765, pssA, NUW86\_05785, NUW86\_05920, NUW86\_05925, NUW86\_06015, NUW86\_06020, NUW86\_06025, NUW86\_06030, NUW86\_06035, NUW86\_06080, NUW86\_06085, NUW86\_06090, NUW86\_06105, NUW86\_06110, NUW86\_06115, NUW86\_06125, NUW86\_06130, NUW86\_06135, NUW86\_06245, NUW86\_06250, NUW86\_06340, NUW86\_06345, NUW86\_06350, NUW86\_06355, NUW86\_06360, NUW86\_06430, NUW86\_06435, NUW86\_06440, NUW86\_06450, NUW86\_06455, NUW86\_06460, NUW86\_06545, NUW86\_06555, NUW86\_06565, NUW86\_06640, NUW86\_06760, NUW86\_06905, NUW86\_06940, NUW86\_06985, NUW86\_07110, NUW86\_07190, NUW86\_07320, NUW86\_07380, NUW86\_07390, NUW86\_07395, NUW86\_07405, NUW86\_07575, NUW86\_07590, truA, NUW86\_07635, NUW86\_07675, hisM, NUW86\_07730, NUW86\_07735, NUW86\_07740, NUW86\_07775, NUW86\_07870, NUW86\_07875, NUW86\_08180, NUW86\_08195,*

NUW86\_08205, *ccmD*, *ccmE*, *dsbE*, NUW86\_08265, NUW86\_08350,  
NUW86\_08380, NUW86\_08415, NUW86\_08465, NUW86\_08635,  
NUW86\_08640, NUW86\_08645, NUW86\_08740, NUW86\_08745,  
NUW86\_08750, NUW86\_08810, *baeR*, *baeS*, *mdtC*, NUW86\_08845,  
NUW86\_08925, *cpsB*, *wcaI*, NUW86\_08995, *rfbF*, NUW86\_09015,  
NUW86\_09020, NUW86\_09030, NUW86\_09040, *rfbK*, NUW86\_09185,  
NUW86\_09305, *cbiB*, NUW86\_09315, NUW86\_09325, NUW86\_09330,  
NUW86\_09335, NUW86\_09345, NUW86\_09350, *cbiD*, *cbiG*,  
NUW86\_09645, NUW86\_09650, NUW86\_09940, NUW86\_09945,  
NUW86\_10020, NUW86\_10025, NUW86\_10030, NUW86\_10045,  
NUW86\_10050, NUW86\_10055, NUW86\_10160, NUW86\_10175,  
NUW86\_10305, NUW86\_10605, NUW86\_10665, NUW86\_10850,  
NUW86\_10940, NUW86\_11020, NUW86\_11070, NUW86\_11110,  
NUW86\_11150, NUW86\_11200, *hyaB*, NUW86\_11310, *narH*, *narI*, *narJ*,  
NUW86\_11340, NUW86\_11430, *oppF*, NUW86\_11475, NUW86\_11535,  
*trpD*, NUW86\_11565, *cobO*, NUW86\_11645, NUW86\_11785,  
NUW86\_12065, NUW86\_12070, NUW86\_12180, NUW86\_12230,  
NUW86\_12305, *narH*, *narI*, *narW*, NUW86\_12325, NUW86\_12385,  
NUW86\_12470, NUW86\_12475, NUW86\_12510, *cybH*, NUW86\_12530,  
*hybD*, *hypC*, NUW86\_12565, *glsB*, NUW86\_12590, NUW86\_12665,  
NUW86\_12940, *nth*, NUW86\_13000, NUW86\_13005, NUW86\_13015,  
NUW86\_13085, NUW86\_13095, NUW86\_13165, *ssaK*, *ssaL*,  
NUW86\_13255, NUW86\_13340, NUW86\_13375, NUW86\_13405,  
NUW86\_13435, NUW86\_13450, NUW86\_13705, *astA*, *astB*, *astD*, *astE*,  
NUW86\_13785, NUW86\_13935, NUW86\_13940, NUW86\_13945,  
NUW86\_13950, NUW86\_13955, NUW86\_14075, NUW86\_14080,  
NUW86\_14090, NUW86\_14095, NUW86\_14100, NUW86\_14170,  
NUW86\_14175, NUW86\_14180, NUW86\_14185, NUW86\_14190,  
NUW86\_14285, NUW86\_14290, NUW86\_14740, NUW86\_14780,  
NUW86\_14785, NUW86\_14820, *ymdB*, NUW86\_14930, NUW86\_15045,  
NUW86\_15320, NUW86\_15325, NUW86\_15330, NUW86\_15340,  
NUW86\_15345, NUW86\_15350, NUW86\_15355, NUW86\_15375,  
NUW86\_15380, NUW86\_15385, NUW86\_15390, NUW86\_15420,  
NUW86\_15425, NUW86\_15430, NUW86\_15435, NUW86\_15440,  
NUW86\_15445, NUW86\_15495, NUW86\_15500, NUW86\_15540,  
NUW86\_15545, NUW86\_15570, NUW86\_15575, NUW86\_15630,  
NUW86\_15685, NUW86\_15840, *infA*, NUW86\_15855, NUW86\_15870,  
NUW86\_15945, NUW86\_16070, NUW86\_16075, NUW86\_16080,  
NUW86\_16085, NUW86\_16090, NUW86\_16155, NUW86\_16160,  
NUW86\_16350, NUW86\_16355, *cecR*, *hlyD*, NUW86\_16360,

NUW86\_16370, NUW86\_16380, *clsB*, NUW86\_16600, NUW86\_16635, NUW86\_16835, NUW86\_16865, NUW86\_16900, NUW86\_17115, *ybeY*, NUW86\_17435, NUW86\_17440, NUW86\_17525, *entF*, NUW86\_17585, NUW86\_17610, NUW86\_17690, NUW86\_17695, NUW86\_17735, NUW86\_17815, NUW86\_17860, NUW86\_17955, NUW86\_17960, NUW86\_18035, *recR*, NUW86\_18155, NUW86\_18160, NUW86\_18255, NUW86\_18260, *cyoB*, NUW86\_18270, NUW86\_18275, NUW86\_18400, NUW86\_18530, NUW86\_18640, NUW86\_18755, NUW86\_18760, NUW86\_18840, NUW86\_19030, NUW86\_19040, NUW86\_19045, *tssM*, NUW86\_19060, NUW86\_19085, NUW86\_19090, NUW86\_19485, NUW86\_19495, *stfF*, *stfH*, NUW86\_19505, NUW86\_19590, NUW86\_19670, NUW86\_19675, NUW86\_19680, NUW86\_19780, NUW86\_19840, *murC*, NUW86\_20210, NUW86\_20220, NUW86\_20305, NUW86\_20355, NUW86\_20365, *bcfG*, NUW86\_20610, NUW86\_20665, NUW86\_20670, NUW86\_20710, *rimI*, NUW86\_20735, NUW86\_20760, *bgIJ*, NUW86\_20800, NUW86\_20805, NUW86\_20810, NUW86\_20825, NUW86\_20875, *hsdM*, NUW86\_20915, NUW86\_21030, NUW86\_21035, *pgIX*, NUW86\_21070, NUW86\_21125, *holC*, NUW86\_21130, NUW86\_21155, *argF*, NUW86\_21185, NUW86\_21265, NUW86\_21285, NUW86\_21320, NUW86\_21515, NUW86\_21555, *ulaE*, NUW86\_21615, NUW86\_21850, NUW86\_21915, NUW86\_22085, NUW86\_22145, NUW86\_22150, NUW86\_22160, NUW86\_22215, *siiA*, *siiC*, *siiD*, NUW86\_22375, NUW86\_22380, NUW86\_22385, NUW86\_22415, NUW86\_22425, NUW86\_22430, NUW86\_22435, NUW86\_22440, NUW86\_22495, NUW86\_22500, NUW86\_22505, NUW86\_22515, NUW86\_22520, NUW86\_22525, NUW86\_22565, NUW86\_22580, NUW86\_22700, *thiC*, *thiE*, *thiS*, NUW86\_22925, NUW86\_22930, NUW86\_22955, NUW86\_23065, NUW86\_23160, NUW86\_23165, NUW86\_23175, NUW86\_23295, NUW86\_23300, NUW86\_23435, NUW86\_23565, NUW86\_23765, *dapF*, *xerC*, *yigB*, NUW86\_23875, *rffM*, *wzxE*, *wzyE*, NUW86\_23895, *rffC*, NUW86\_24035, NUW86\_24065, NUW86\_24185, NUW86\_24205, *oadA*, *oadA*, *odhB*, *ompA*, *ompS1*, *ompX*, *oppA*, *otsA*, *otsB*, *pal*, *panB*, *parC*, *pckA*, *pduA*, *pduB*, *pduC*, *pduD*, *pduE*, *pduG*, *pduH*, *pduK*, *pduL*, *pduM*, *pduN*, *pduO*, *pduP*, *pdxA*, *rsmA*, *surA*, *pdxB*, *pepD*, *pflA*, *pflB*, *pflB*, *pgi*, *pgk*, *pgpA*, *thiL*, *pgsA*, *pgtA*, *pgtB*, *pgtC*, *pheA*, *pheP*, *pheS*, *pheT*, *phnT*, *phnV*, *phoE*, *phoU*, *pitA*, *plaP*, *yoel*, *plsB*, *plsC*, *plsX*, *pmbA*, *pmrB*, *pnp*, *pntB*, *potA*, *potB*, *potD*, *potH*, *potI*, *poxB*, *ppc*, *pphB*, *ppiA*, *ppiB*, *ppk1*, *pqiB*, *pqiC*, *prfA*, *prmC*, *sirB2*, *prfB*, *prfC*, *prgH*, *prlC*, *prmB*, *proB*, *proP*, *prpR*, *pspA*, *pspF*, *pstA*, *pstC*, *pstB*, *pstS*, *pta*, *ptrB*, *ptsG*, *ptsH*, *ptsI*, *ptsP*, *purB*, *purF*, *purH*, *purL*, *purM*, *purN*, *putA*, *putP*,

|           |                                                                                                                                                                                                                                                                                          |                                                                                                                                                                                                                                                                                                                                                                                                                                                                                                                                                                                                                                                                                                                                                                                                                                                                                                                                                                                                                                                                                                                                                                                                                                                                                                                                                                                       |
|-----------|------------------------------------------------------------------------------------------------------------------------------------------------------------------------------------------------------------------------------------------------------------------------------------------|---------------------------------------------------------------------------------------------------------------------------------------------------------------------------------------------------------------------------------------------------------------------------------------------------------------------------------------------------------------------------------------------------------------------------------------------------------------------------------------------------------------------------------------------------------------------------------------------------------------------------------------------------------------------------------------------------------------------------------------------------------------------------------------------------------------------------------------------------------------------------------------------------------------------------------------------------------------------------------------------------------------------------------------------------------------------------------------------------------------------------------------------------------------------------------------------------------------------------------------------------------------------------------------------------------------------------------------------------------------------------------------|
|           |                                                                                                                                                                                                                                                                                          | <p><i>pykF, pyrD, pyrF, yciH, pyrG, qseE, radA, rapA, rarA, ratA, rbsB, recC, recA, recG, recJ, relA, rep, rfaC, rfaF, rfbA, rffG, wecB, wecC, rhaA, rhaB, rhaS, rhlE, ribA, ribF, ridA, rlmB, rlmI, rna, rne, rnhA, rnm, rnpB, robA, rph, rplA, rplB, rplC, rplD, rplW, rplF, rplJ, rplL, rplO, rplQ, rplR, rplV, rpmB, rpmD, rpoB, rpoC, rpoD, rpoE, rseD, rppH, rpsA, rpsB, rpsD, rpsG, rpsH, rpsJ, rpsK, rpsM, rpsO, rpsT, rseA, rseB, rseC, rsmE, rspA, rsuA, ruvA, sada, sapA, sapB, sapC, sapD, sapF, sbcB, sbcC, sbcD, sdaB, sdaC, sdhA, sdhC, sdhD, secA, secF, secG, secY, selD, serA, setB, sgrR, shdA, siiE, siiF, sipA, sitA, sitB, sitC, sitD, slrP, sltY, slyD, sodA, solA, sopA, sopD, speB, speD, speE, srmB, ssb1, sseA, sseB, sspH2, ssrA, stbD, stbE, sthA, stjC, sucA, sucC, sucD, suhB, tamA, tamB, tatB, tatE, tcyL, yecC, tdcC, tdh, tgt, thiB, thiP, thiQ, thiL, thpR, thrA, thrB, thrC, thrS, thyA, tkt, tkt, tmcA, tmpA, tola, tolB, tolC, topA, topB, torS, tpiA, treY, treZ, trmA, trxB, tsf, tssH, tuf, tuf, tus, typA, tyrA, tyrB, tyrR, tyrS, ubiA, ubiC, ubiD, ugpB, uhpA, uhpB, uhpT, ushA, uvrA, uvrB, uvrC, uvrY, wzz(fepE), wzzE, xanP, xylA, yajC, ybeD, ybiO, yccA, yccX, ycdR, ychH, ydgT, yeaG, yeaR, yejF, ygiD, ygiG, yhaJ, yhdP, yiaK, yicI, yidC, yieH, yjiA, yoaE, yvcK, zapA, zapE, zirT, znuA, znuB, znuC, zraR, zraS, zwf</i></p>    |
| Spark PFW | <p><b>27 Genes/ Loci:</b> <i>araB, atpA, ccmA, ccmB, dnaA, dnaE, fdhE, fdol, fdxH, NUW86_00545, NUW86_00875, NUW86_02255, NUW86_05725, NUW86_08340, NUW86_15095, NUW86_16360, NUW86_19240, NUW86_21055, NUW86_22625, NUW86_22845, NUW86_24060, ppnN, rho, rseP, tcuA, tcuB, wecA</i></p> | <p><b>1304 Genes/Loci:</b> <i>aas, aat, accA, accB, accC, aceA, aceB, aceE, aceF, aceK, ackA, acnB, acpP, acpS, pdxJ, acrB, acrD, acs, adeP, adhE, adk, ahpC, alaC, alaS, aldB, alkB, allD, amiA, ampG, ampH, amyA, ansA, ansB, ansP, apt, araC, araE, arcB, argH, argR, argS, argT, arnA, arnC, arnD, arnE, arnF, arnT, aroA, aroB, aroG, aroK, artJ, artM, artQ, artP, asd, asmA, asnB, asnS, aspS, atpD, azoR, bamA, bamC, bamD, bcsB, bcsC, bcsZ, bepA, bioA, bioB, bioC, bioD, bioF, bioH, birA, murB, brxL, btsT, btuF, mtnN, cada, cadB, caiF, caiT, can, carA, carB, chaA, chbG, cheB, cheR, cirA, citC, citD, citE, citD, citE, citF, citG, citX, citS, clcA, clpB, clpP, cmoM, mukB, mukE, mukF, cnoX, coaA, copA, corA, cpdA, yqiA, cpoB, cpsG, cpxA, cpxR, cpxP, creB, creC, creD, crp, csdA, csdE, csiE, cspE, cspE, cstA, cueP, cueR, cybC, cycA, cydA, cydB, cysA, cysP, cysT, cysW, cysD, cysE, cysG, cysH, cysM, cysS, dacA, dacD, dadX, dam, damX, dapD, dapE, dbpA, dcuB, dcuC, ddlA, deaD, yrbN, degP, deoA, deoB, der, dinG, dld, dmsA, dmsB, dnaG, dnaJ, dnaK, dnaN, dnaX, dpiA, dpiB, dppB, dppC, dppD, dppF, dsbA, dsdA, dsdX, dtpA, dtpB, dtpD, dusB, dusC, eco, efp, emrD, eno, entE, envC, epmA, era, rnc, eutA, eutH, eutB, eutC, eutR, fabA, fabB, fabF, fabH, fadB, fbaA, fbaB, fbp, fdhD, fdnG, fdnG, feoB, fepC, fepD, fepG, fes, fetA, fetB,</i></p> |

*ffh, fhuB, fis, flgG, fliE, fliF, fliG, fliH, fliI, fliM, fliN, fliO, fliP, fliR, fliS, fliT, fnr, folD, folK, pcnB, fraB, frdA, frdB, fruB, fruK, fsa, ftsA, ftsQ, ftsH, ftsI, mraY, murE, murF, ftsK, ftsL, rsmH, ftsN, ftsW, murD, murG, ftsZ, fucA, fumB, fusA, gabD, gabT, galE, galK, galM, galP, galR, galT, gapA, garD, garR, gatD, gcvA, gcvP, gcvT, gdhA, ggt, glgA, glgC, glgB, glgX, glgP, glmS, glmU, glnA, glnE, glnG, glnH, glnL, glpE, glpK, glpX, gltB, gltD, gltJ, gltK, gltL, gltX, glxR, glyQ, glyS, gndA, gntK, gntU, gntR, gntT, golT, gpsA, secB, grcA, greA, gshA, gsiD, gspE, hofC, guaA, guaB, gudD, gutQ, srlR, gyrA, gyrB, hcp, helD, hemC, hemD, hemE, hemH, hemL, hemN, hflD, hflK, hflX, hfq, hilC, hisA, hisB, hisC, hisD, hisF, hisH, hisIE, hisS, hmpA, hmsP, hns, holB, tmk, yceG, hpaD, hpaE, hpaG, hpaI, hpt, hrpA, hrpB, hscA, hsdR, htpG, htpX, hutG, hutI, hutH, hycB, hycC, hycE, iaaA, ibpA, icd, ihfA, ileS, lspA, ilvA, ilvB, ilvC, ilvD, ilvE, ilvG, ilvM, ilvN, infB, infC, invC, spaK, spaM, spaN, spaO, spaP, iolB, iolC, iolE, iolT1, iroC, iscS, ispA, ispG, katE, katG, kdpB, kdsC, lptA, lptC, kup, ldcC, ldtA, ldtB, ldtD, lepA, leuA, leuB, leuC, leuE, leuS, lipA, livF, livG, livH, livM, livJ, livK, lldD, lldP, lldR, lolC, lolD, lolE, lon, lpdA, lplA, lplT, lptD, lpxA, lpxB, rnhB, lpxC, lpxD, lsrA, lsrC, lsrD, lsrB, lsrK, lysC, lysP, lysS, maa, maeB, malF, malG, malK, malP, malQ, malT, manA, manX, mazG, mdh, mdoG, mdoH, mdsA, mdsB, mdtA, mdtB, mdtD, mdtQ, mepS, meta, metE, metF, metG, metH, metK, metL, metQ, mfd, mglA, mglB, mgtA, miaA, mutL, minD, minE, mioC, mlaB, mlaC, mlaE, mltB, mltD, mnmA, mnmE, mnmG, moaA, moaB, moaE, motA, motB, mraZ, mrdA, mrdB, mreB, mreC, mtlA, mug, mutM, nadA, nadB, nadC, nadE, nadR, nagA, napG, napH, nepI, nfuA, nhaA, nifJ, nirB, nirD, nirC, nlpE, nlpI, nnr, tsaE, nrdA, nrdB, yfaE, nrdD, nrdR, nrfB, nrfC, nrfD, nrfEF, nrfG, nudC, nuoA, nuoC, nuoG, nuoH, nuoI, nuoJ, nuoK, nuoL, nuoN, nupC, nusA, nusG, NUW86\_00030, NUW86\_00050, NUW86\_00055, dgoD, dgoR, NUW86\_00065, NUW86\_00115, NUW86\_00130, NUW86\_00140, ccmD, ccmE, dsbE, NUW86\_00240, NUW86\_00360, NUW86\_00365, NUW86\_00375, dgaE, NUW86\_00385, NUW86\_00435, NUW86\_00475, NUW86\_00775, NUW86\_00910, NUW86\_00965, NUW86\_00970, NUW86\_01005, NUW86\_01010, tag, NUW86\_01020, NUW86\_01070, NUW86\_01080,*

*NUW86\_01175, NUW86\_01195, NUW86\_01215, NUW86\_01220, NUW86\_01330, NUW86\_01355, NUW86\_01365, NUW86\_01470, ugpQ, NUW86\_01500, NUW86\_01520, NUW86\_01580, NUW86\_01585, NUW86\_01590, NUW86\_01715, NUW86\_01775, NUW86\_01780, NUW86\_01785, NUW86\_01790, hofQ, NUW86\_01840, tnpA, NUW86\_01945, NUW86\_02245, NUW86\_02265, NUW86\_02290, NUW86\_02295, NUW86\_02465, NUW86\_02490, NUW86\_02530, NUW86\_02600, NUW86\_02875, NUW86\_02880, NUW86\_02885, NUW86\_02890, NUW86\_02895, NUW86\_02905, NUW86\_02930, NUW86\_02935, NUW86\_03040, NUW86\_03065, NUW86\_03100, NUW86\_03110, NUW86\_03150, NUW86\_03155, NUW86\_03160, NUW86\_03300, NUW86\_03305, NUW86\_03320, nudF, NUW86\_03400, NUW86\_03455, NUW86\_03550, NUW86\_03575, NUW86\_03580, NUW86\_03595, NUW86\_03610, NUW86\_03615, NUW86\_03655, NUW86\_03735, yggU, NUW86\_03740, NUW86\_03760, rivX, NUW86\_03855, NUW86\_03865, NUW86\_03870, NUW86\_03875, NUW86\_03905, NUW86\_03935, NUW86\_03985, NUW86\_04185, NUW86\_04215, NUW86\_04340, rlmM, NUW86\_04440, gudP, NUW86\_04535, NUW86\_04625, ispD, ispF, surE, truD, NUW86\_04670, NUW86\_04675, NUW86\_04680, NUW86\_04685, NUW86\_04690, NUW86\_04695, NUW86\_04705, NUW86\_04710, NUW86\_04745, NUW86\_04925, orgA, orgB, prgJ, prgK, NUW86\_05015, NUW86\_05035, hycF, hycG, hycI, NUW86\_05100, srlA, NUW86\_05190, NUW86\_05335, NUW86\_05385, NUW86\_05390, NUW86\_05495, NUW86\_05535, NUW86\_05560, NUW86\_05570, NUW86\_05670, dgcN, NUW86\_05735, NUW86\_05785, NUW86\_05865, NUW86\_05870, NUW86\_05920, NUW86\_05925, NUW86\_05960, NUW86\_05965, NUW86\_05970, NUW86\_06015, NUW86\_06020, NUW86\_06025, NUW86\_06030, NUW86\_06035, NUW86\_06075, NUW86\_06080, NUW86\_06085, NUW86\_06090, NUW86\_06105, NUW86\_06110, NUW86\_06115, NUW86\_06125, NUW86\_06130, NUW86\_06135, NUW86\_06190, NUW86\_06195, NUW86\_06245, NUW86\_06250, NUW86\_06340, NUW86\_06345, NUW86\_06350, NUW86\_06355, NUW86\_06360, NUW86\_06430, NUW86\_06435, NUW86\_06440, NUW86\_06450, NUW86\_06455,*



*NUW86\_06460, NUW86\_06565, NUW86\_06640, NUW86\_06645, NUW86\_06760, NUW86\_06795, NUW86\_06895, NUW86\_06955, NUW86\_06985, NUW86\_07110, NUW86\_07305, NUW86\_07380, NUW86\_07390, NUW86\_07470, NUW86\_07485, NUW86\_07640, NUW86\_07765, NUW86\_07770, NUW86\_07875, NUW86\_07995, NUW86\_08005, NUW86\_08045, NUW86\_08105, NUW86\_08125, NUW86\_08245, NUW86\_08295, NUW86\_08310, NUW86\_08355, NUW86\_08365, NUW86\_08370, NUW86\_08445, NUW86\_08475, NUW86\_08495, NUW86\_08555, NUW86\_08635, NUW86\_08640, NUW86\_08645, NUW86\_08660, btsR, NUW86\_08810, baeR, baeS, mdtC, NUW86\_08845, NUW86\_08870, NUW86\_08925, cpsB, wcaI, NUW86\_09015, NUW86\_09185, NUW86\_09305, cbiB, NUW86\_09315, NUW86\_09325, NUW86\_09330, NUW86\_09335, NUW86\_09345, NUW86\_09350, cbiD, cbiG, NUW86\_09380, NUW86\_09385, cobS, cobU, NUW86\_09480, NUW86\_09645, NUW86\_09650, NUW86\_09895, NUW86\_09900, NUW86\_09905, NUW86\_09940, NUW86\_09945, NUW86\_09975, NUW86\_09980, NUW86\_09985, NUW86\_10110, NUW86\_10265, NUW86\_10435, NUW86\_10580, NUW86\_10605, NUW86\_10760, NUW86\_10815, NUW86\_10970, NUW86\_11110, NUW86\_11115, NUW86\_11125, NUW86\_11200,hyaB, NUW86\_11310, narH, narI, narJ, NUW86\_11430, oppF, NUW86\_11475, NUW86\_11505, NUW86\_11790, NUW86\_11825, NUW86\_11850, NUW86\_12000, NUW86\_12060, NUW86\_12065, NUW86\_12070, NUW86\_12075, NUW86\_12095, aac(6'), NUW86\_12220, srfC, NUW86\_12285, NUW86\_12305, narH, narI, narW, NUW86\_12420, NUW86\_12485, NUW86\_12490, NUW86\_12500, NUW86\_12530, hybD, hypC, NUW86\_12535, NUW86\_12540, NUW86\_12660, NUW86\_12665, NUW86\_12705, NUW86\_12770, NUW86\_12815, ydgH, NUW86\_13705, astA, astB, astD, astE, NUW86\_13835, NUW86\_13865, NUW86\_13885, NUW86\_13985, NUW86\_14020, NUW86\_14075, NUW86\_14080, NUW86\_14090, NUW86\_14095, NUW86\_14100, NUW86\_14115, NUW86\_14120, NUW86\_14125, NUW86\_14170, NUW86\_14175, NUW86\_14180, NUW86\_14185, NUW86\_14190, NUW86\_14285, NUW86\_14290, NUW86\_14410, NUW86\_14765, NUW86\_14880, NUW86\_14920, NUW86\_14930,*

*NUW86\_15045, NUW86\_15090, hprR, NUW86\_15175, NUW86\_15195, NUW86\_15325, NUW86\_15330, NUW86\_15340, NUW86\_15345, NUW86\_15350, NUW86\_15355, NUW86\_15375, NUW86\_15380, NUW86\_15420, NUW86\_15425, NUW86\_15430, NUW86\_15435, NUW86\_15440, NUW86\_15445, NUW86\_15495, NUW86\_15500, NUW86\_15570, NUW86\_15575, NUW86\_15635, NUW86\_15685, NUW86\_15775, NUW86\_15945, NUW86\_15955, NUW86\_15960, NUW86\_16000, NUW86\_16055, nfsA, NUW86\_16070, NUW86\_16090, NUW86\_16220, NUW86\_16230, NUW86\_16245, NUW86\_16270, NUW86\_16350, NUW86\_16355, cecR, hlyD, NUW86\_16370, NUW86\_16380, clsB, NUW86\_16495, NUW86\_16510, NUW86\_16585, NUW86\_16590, NUW86\_16820, NUW86\_16825, NUW86\_16850, glf, NUW86\_16865, NUW86\_16910, NUW86\_16960, NUW86\_16990, fur, NUW86\_17115, ybeY, NUW86\_17180, NUW86\_17185, NUW86\_17305, NUW86\_17395, NUW86\_17400, NUW86\_17405, NUW86\_17410, NUW86\_17445, NUW86\_17450, NUW86\_17475, entA, NUW86\_17525, entF, NUW86\_17535, NUW86\_17545, NUW86\_17595, NUW86\_17600, NUW86\_17765, NUW86\_17770, NUW86\_17775, NUW86\_17805, NUW86\_17860, NUW86\_17900, sfbB, NUW86\_17915, NUW86\_17920, NUW86\_17925, NUW86\_17935, NUW86\_17955, NUW86\_17960, NUW86\_17995, NUW86\_18035, recR, NUW86\_18105, NUW86\_18120, NUW86\_18180, NUW86\_18255, NUW86\_18260, cyoB, NUW86\_18360, NUW86\_18415, NUW86\_18600, NUW86\_18615, NUW86\_18665, cydB, NUW86\_18685, NUW86\_18750, NUW86\_18805, NUW86\_18810, NUW86\_18960, NUW86\_19030, NUW86\_19225, NUW86\_19255, metN, NUW86\_19295, rof, NUW86\_19620, NUW86\_19625, NUW86\_19640, NUW86\_19740, NUW86\_19745, NUW86\_19840, murC, NUW86\_19970, NUW86\_20090, NUW86\_20220, NUW86\_20340, NUW86\_20355, NUW86\_20465, NUW86\_20515, NUW86\_20535, NUW86\_20625, NUW86\_20665, NUW86\_20670, NUW86\_20710, rimI, NUW86\_20765, NUW86\_20770, NUW86\_20820, NUW86\_20825, NUW86\_20900, NUW86\_20980, NUW86\_20995, NUW86\_21030, NUW86\_21035, pgIX, NUW86\_21125, holC, NUW86\_21155, argF,*

*NUW86\_21270, NUW86\_21275, NUW86\_21280, NUW86\_21290, NUW86\_21320, NUW86\_21460, NUW86\_21470, NUW86\_21555, ulaE, NUW86\_21630, NUW86\_21635, NUW86\_21640, NUW86\_21645, NUW86\_21740, NUW86\_21880, cutA, NUW86\_21920, NUW86\_21925, NUW86\_21970, dmsB, NUW86\_21980, NUW86\_22085, NUW86\_22135, actP, NUW86\_22160, NUW86\_22275, NUW86\_22290, NUW86\_22345, NUW86\_22425, NUW86\_22430, NUW86\_22435, NUW86\_22440, NUW86\_22515, NUW86\_22520, NUW86\_22565, NUW86\_22615, NUW86\_22700, thiC, thiE, thiS, NUW86\_22830, NUW86\_22955, NUW86\_22975, NUW86\_23085, NUW86\_23235, NUW86\_23240, NUW86\_23350, NUW86\_23355, NUW86\_23360, NUW86\_23450, NUW86\_23455, NUW86\_23460, NUW86\_23550, NUW86\_23565, NUW86\_23580, pepQ, NUW86\_23685, NUW86\_23735, NUW86\_23765, dapF, xerC, yigB, NUW86\_23780, NUW86\_23785, NUW86\_23790, NUW86\_23895, rffC, NUW86\_23975, NUW86\_23980, NUW86\_24050, NUW86\_24215, NUW86\_24270, yidZ, NUW86\_24285, oadA, oadA, oadA, odhB, ompA, ompS1, oppA, oxyR, pabA, pabB, pal, panC, panE, yajL, parC, parE, patD, pckA, pdhR, pduA, pduB, pduE, pduG, pduH, pduQ, pduS, pduV, pduW, pdxA, rsmA, surA, pdxH, pepA, pepP, ubiH, pfkA, pflB, pflB, pgi, pgk, pgl, pglZ, pgm, pgtA, pgtB, pgtC, pheA, pheS, phnT, phoP, phoQ, phoU, pldB, plsB, plsX, pmbA, pncC, pnp, pntB, polB, potE, speF, potF, potH, potI, ppc, ppiA, ppiD, ppkI, ppsA, ppx, prc, prfA, prmC, sirB2, prfB, prfC, proC, proS, proV, proW, proY, pspA, pstB, pta, ptrA, recB, recD, ptrB, ptsG, ptsG, ptsI, ptsJ, punC, purA, purB, purE, purK, purL, putA, putP, pykF, pyrF, yciH, pyrG, pyrH, queA, radA, rapA, rarA, rarD, ratB, ravA, viaA, rbfA, truB, rbsA, rbsC, rcsB, rcsC, rcsD, recG, recQ, relA, rfaD, rhaA, rhaB, rhaS, rhaT, rhlB, rhlE, ribF, rimO, ripC, ripR, rlmB, rlmD, rlmE, rlmKL, rluB, rluD, yfiH, rluF, rmf, rnpA, yidD, rnpB, rnr, rplA, rplB, rplC, rplE, rplI, rplJ, rplK, rplM, rplN, rplO, rplP, rpmC, rpsQ, rplQ, rplR, rplV, rpmB, rpoA, rpoB, rpoC, rpoH, rpoN, rpoS, rpsA, rpsD, rpsE, rpsF, rpsG, rpsH, rpsK, rpsM, rpsP, rraA, rrf, rrf, rseA, rseB, rseC, rsmE, rsmI, rstB, rsxD, rtcA, rtcR, sapA, sapB, sapC, sapD, sapF, sbcC, sbcD, sbmA, sdaA, sdaB, sdaC, sdhA, sdhC, sdhD, sdhB, secA, secD,*

|                 |                                                                                                                                                                                                                                                                                                                                    |                                                                                                                                                                                                                                                                                                                                                                                                                                                                                                                                                                                                                                                                                                                                                                                                                                                                                                                                                                                                                                                                                                                                                                                                               |
|-----------------|------------------------------------------------------------------------------------------------------------------------------------------------------------------------------------------------------------------------------------------------------------------------------------------------------------------------------------|---------------------------------------------------------------------------------------------------------------------------------------------------------------------------------------------------------------------------------------------------------------------------------------------------------------------------------------------------------------------------------------------------------------------------------------------------------------------------------------------------------------------------------------------------------------------------------------------------------------------------------------------------------------------------------------------------------------------------------------------------------------------------------------------------------------------------------------------------------------------------------------------------------------------------------------------------------------------------------------------------------------------------------------------------------------------------------------------------------------------------------------------------------------------------------------------------------------|
|                 |                                                                                                                                                                                                                                                                                                                                    | <p><i>secF, secY, selD, serA, shdA, sifA, siiF, sitA, sitB, sitC, sitD, sltY, smpB, smvA, sodA, sodB, speA, speG, spoT, srfJ, srlD, sseD, sspA, ssrA, sstT, stbD, stbE, stdB, stfD, sthA, sthE, sucA, sucC, sucD, sufA, sufC, sufD, sufS, tadA, tal, tamA, tamB, tatC, tatD, tgt, thiG, thiH, thiI, thrA, thyA, tig, tkt, tnpA, tnpA, tolB, tonB, topB, torA, torC, torD, tpiA, treB, trmD, trpA, trpB, tsf, tsr, tssK, tssL, ttcA, ttdA, ttdB, tuf, typA, tyrB, ubiF, ubiK, uhpA, uhpB, uhpT, ulaA, ulaB, ulaC, ulaG, uraA, ushA, uvrA, uvrB, uvrC, uvrY, uvrD, vapB, vapC, waaa, wcaM, wzz(fepE), xanP, xthA, yacL, ybiO, ycjG, yeaG, yegQ, yejM, yfhh, ygbI, ygfZ</i></p>                                                                                                                                                                                                                                                                                                                                                                                                                                                                                                                                  |
| Glow PFW        | <p><b>33 Genes/Loci:</b> <i>araB, atpA, carB, ccmA, ccmB, cysI, cysJ, dnaA, dnaE, fdhE, fdol, fdxH, groL, NUW86_00545, NUW86_00875, NUW86_02255, NUW86_05725, NUW86_08340, NUW86_15095, NUW86_16360, NUW86_19240, NUW86_21055, NUW86_22625, NUW86_22845, NUW86_23565, NUW86_24060, ppnN, rho, rpoC, rseP, tcuA, tcuB, wecA</i></p> | <p><b>137 Genes/ Loci:</b> <i>acpS, araD, argG, asnB, atpE, bsmA, cgtA, clcA, clpX, crr, ccmD, ccmE, cspE, csrA, cysA, cysP, cysT, cysW, cysK, cysS, dacB, ddlA, dnaK, dsbE, fdhD, fldA, fljA, ftsZ, glgP, glrR, qseG, gltB, gltD, glyS, guaB, hybG, hycE, ibpA, kup, ldcC, lon, lplA, lpxD, lysM, manY, metB, metR, norV, norW, NUW86_00845, NUW86_00855, NUW86_01190, NUW86_01225, NUW86_02265, NUW86_03110, NUW86_05460, NUW86_05735, NUW86_06015, NUW86_06020, NUW86_06025, NUW86_06030, NUW86_06035, NUW86_06105, NUW86_06110, NUW86_06440, NUW86_06640, NUW86_06655, NUW86_06660, NUW86_08180, NUW86_08195, NUW86_08205, NUW86_08785, NUW86_09415, NUW86_10395, NUW86_13455, NUW86_13460, NUW86_14090, NUW86_14170, NUW86_14175, NUW86_14180, NUW86_14185, NUW86_14190, NUW86_16070, NUW86_16600, NUW86_19225, NUW86_20220, NUW86_20240, NUW86_21740, NUW86_22290, NUW86_22615, NUW86_22830, NUW86_23550, NUW86_23875, NUW86_24050, oadA, ppc, pdxJ, ppiB, prfC, proY, prpR, pta, rarA, rffM, rhaT, rluC, rnpB, rplB, rplD, rplW, rplU, rpmA, rpoA, rpsB, rpsC, rrf, sdhB, secY, setB, sopB, ssbI, ssrS, sucC, sucD, thrS, topA, tuf, tyrS, ubiD, ubiF, udp, ulaD, uvrD, waaZ, wzxE, wzyE, yeaG</i></p> |
| Ultraviolet LED | <p><b>34 Genes/ Loci:</b> <i>araB, atpA, carB, ccmA, ccmB, cysI, cysJ, dnaA, dnaE, fdhE, fdol, fdxH, groL, NUW86_00545, NUW86_00875, NUW86_02255, NUW86_02265, NUW86_08340, NUW86_15095, NUW86_16360, NUW86_19240, NUW86_21055, NUW86_22615, NUW86_22625, NUW86_22830, NUW86_23550, NUW86_24050,</i></p>                           | <p><b>40 Genes/Loci:</b> <i>adhE, adiC, dnaX, dppD, dppF, fusA, gmk, hmsP, malE, mdh, nrdD, nuoJ, nuoK, nuoL, NUW86_01945, NUW86_02600, NUW86_04215, NUW86_05725, NUW86_05735, NUW86_06440, NUW86_11345, NUW86_14090, NUW86_16245, NUW86_16800, NUW86_19225, NUW86_22845, NUW86_23565, NUW86_23895, rffC, NUW86_23975, NUW86_23980, NUW86_24060, parC, phnW, ppc, rplB, rpoB, secY, tuf, yoaE</i></p>                                                                                                                                                                                                                                                                                                                                                                                                                                                                                                                                                                                                                                                                                                                                                                                                         |

|  |                                                          |  |
|--|----------------------------------------------------------|--|
|  | <i>ppnN, rho, rpoC, rseP, tcuA, tcuB,</i><br><i>wecA</i> |  |
|--|----------------------------------------------------------|--|
